# Supplementary material for: A study on effects of naphthalimide derivative-capped quantum dots on the cellular internalization, proliferation, and apoptosis ability
Source: Royal Society of Chemistry journal article supplement (doi:10.1039/c4tb01048e), 2014-01-01
Supplement: c4tb01048e1.pdf [file c4tb01048e1.pdf]

Supporting Information for:

**Study on effects of naphthalimide derivative-capped quantum dots on the cellular internalization, proliferation, and apoptosis ability**

*Mei-Xia Zhao\*, Er-Zao Zeng, Yang Li, and Chao-Jie Wang\**

Key Laboratory of Natural Medicine and Immune Engineering, Henan University, Jinming  
Road, Kaifeng 475004, P.R. China

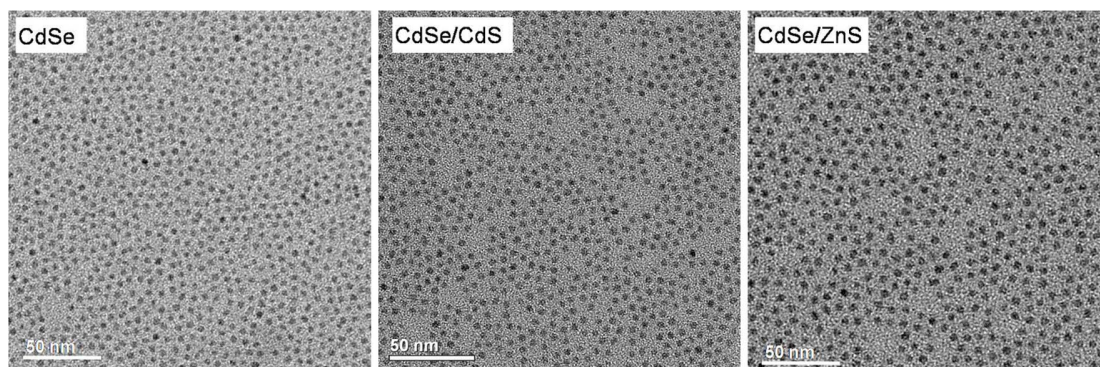

**Fig. S1** TEM images of the QD. Scale bars: 50 nm.

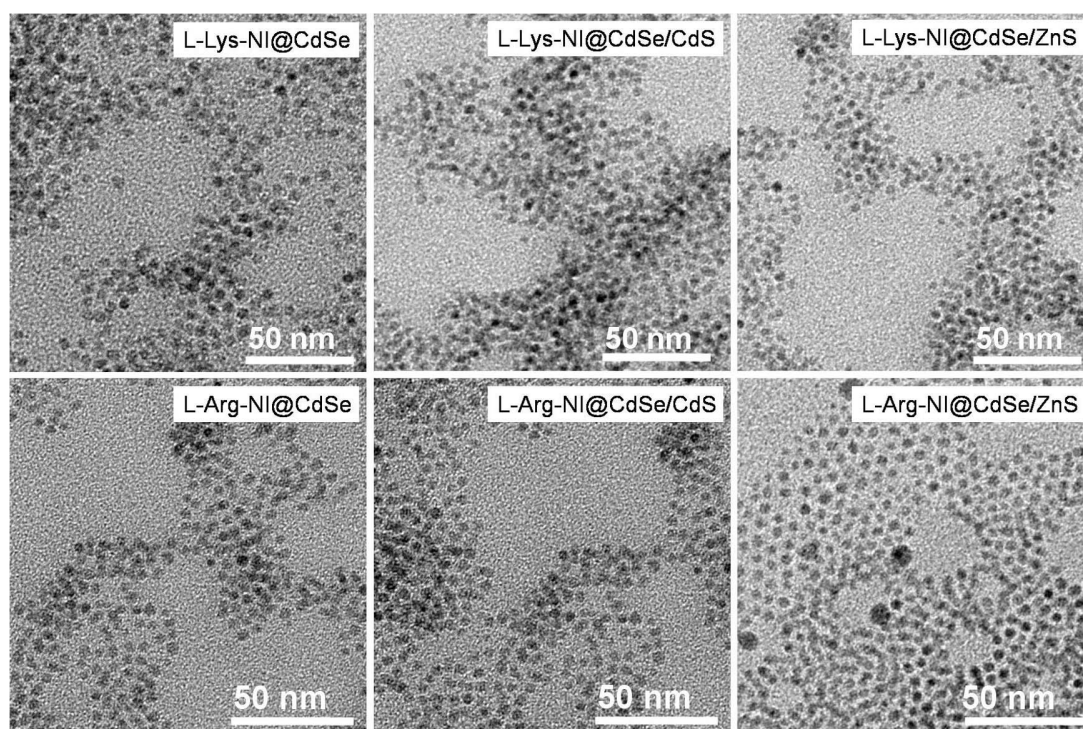

**Fig. S2** TEM images of the naphthalimide derivative-capped QDs. Scale bars: 50 nm.

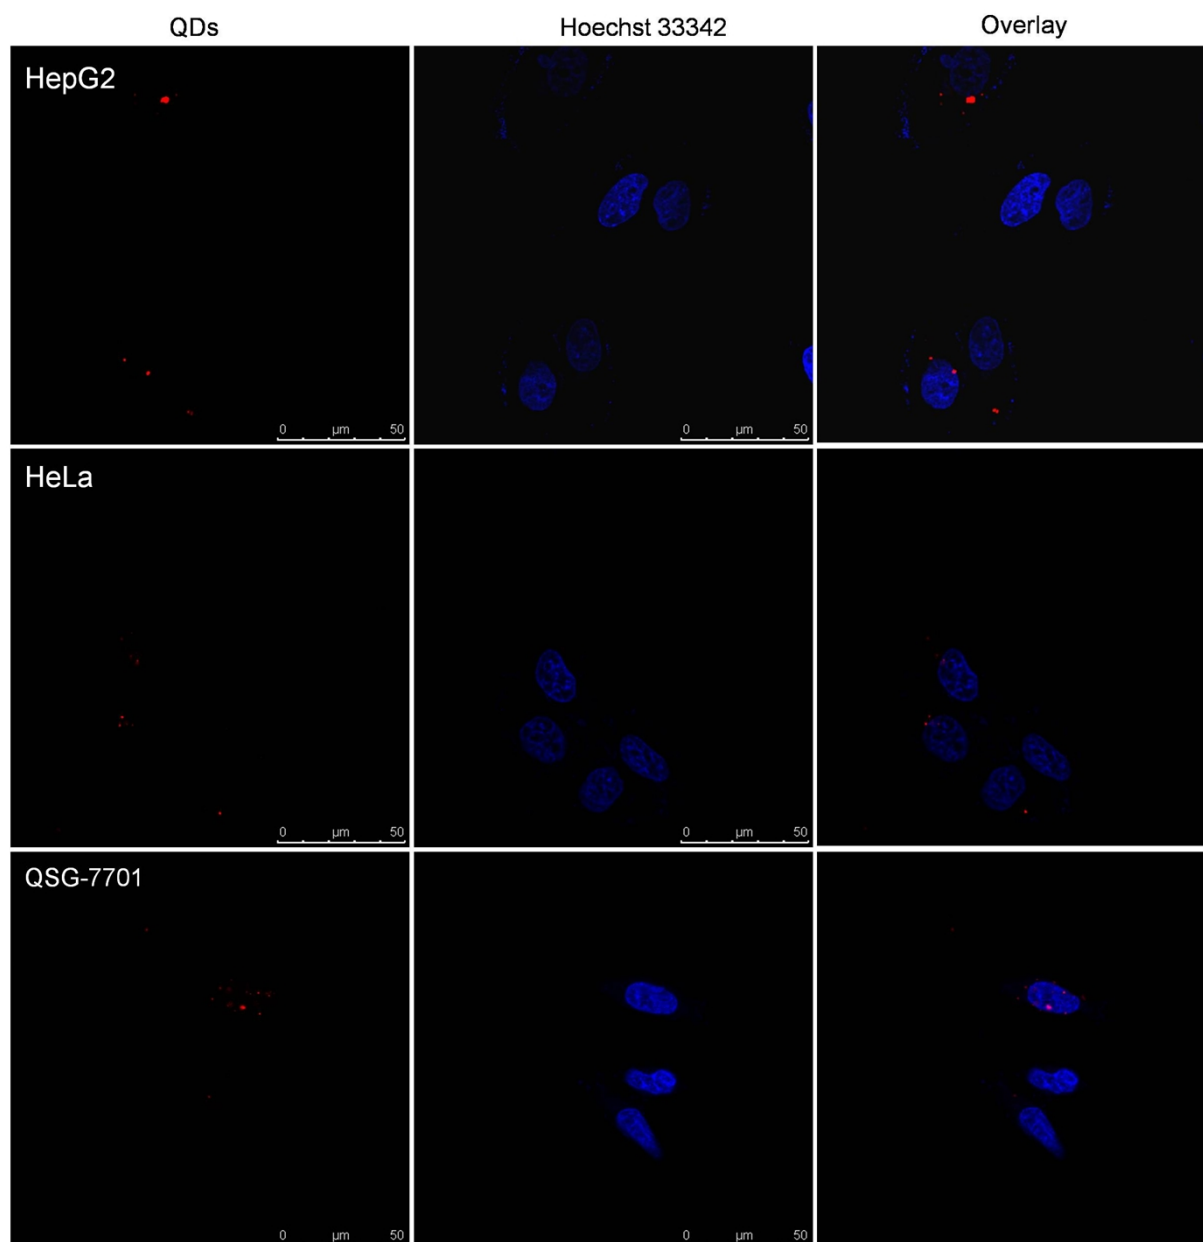

Fig. S3 Confocal images of living cells (HepG2, HeLa, and QSG-7701) loaded with CdSe/ZnS under identical conditions. CdSe/ZnS QDs solution (0.3  $\mu\text{M}$ ) were used and incubated with the cells at 37  $^{\circ}\text{C}$  for 12 h. In all cases, blue represents emission from Hoechst 33342 and red represents emission from QDs.

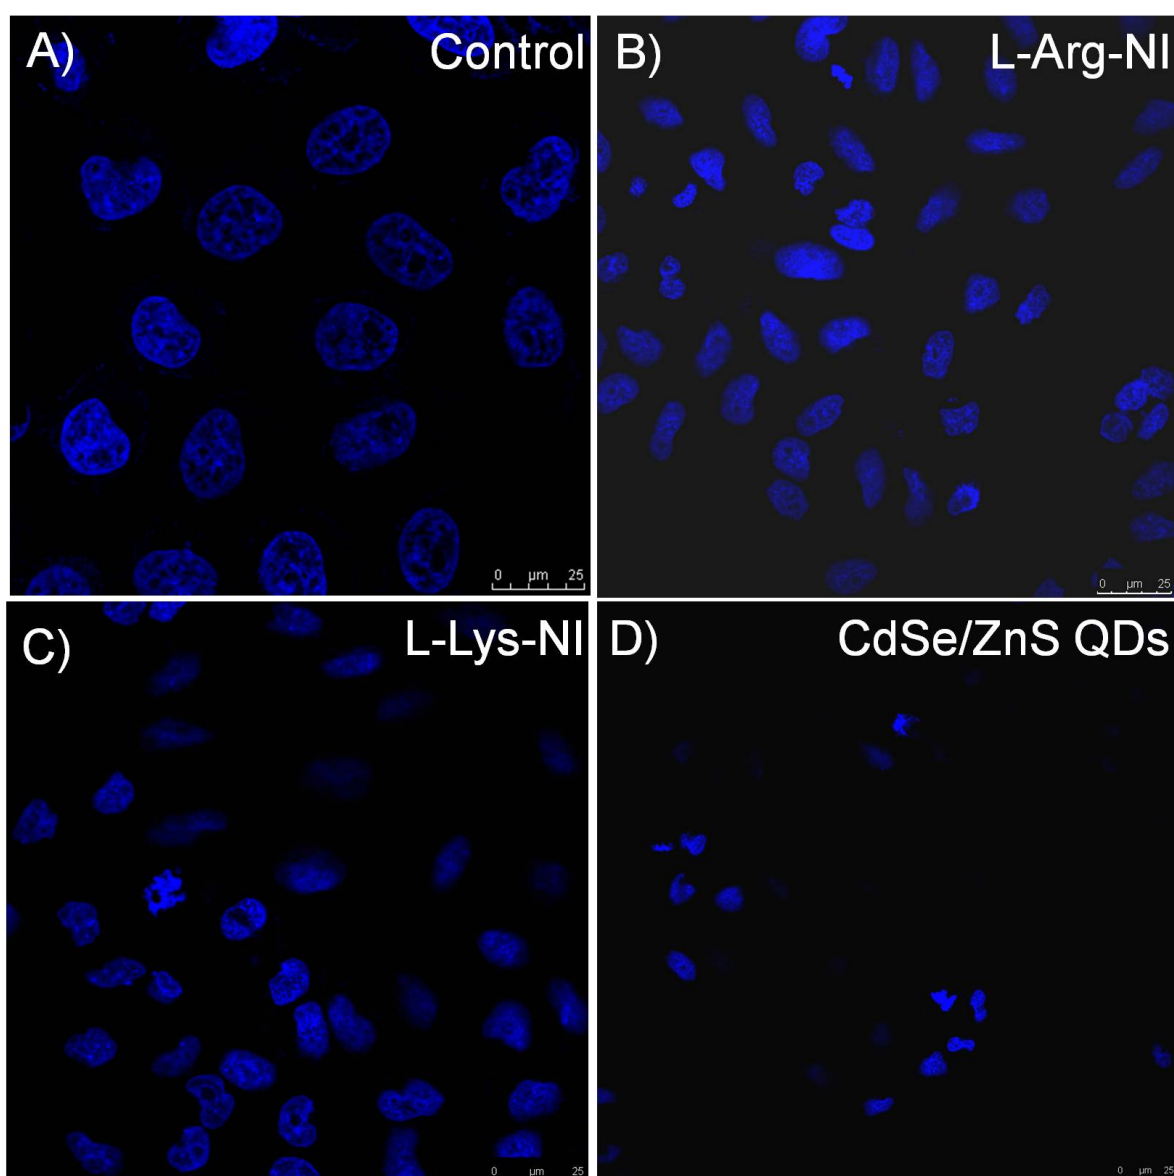

**Fig. S4** Morphological changes were examined by Hoechst 33342 staining and observed with a confocal microscope. HepG2 cells were treated with L-Arg-NI, L-Arg-NI (B), L-Lys-NI (C), CdSe/ZnS (D) for 24 h.

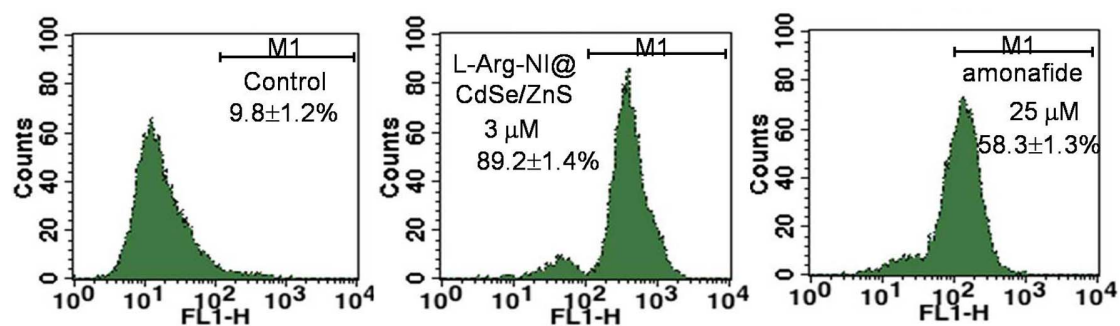

**Fig. S5** The results of flow cytometry of the stages of apoptosis.

Table S1 The cytotoxicity activity of the naphthalimide derivatives, QDs, and naphthalimide derivative-capped QDs.

| Samples           | IC <sub>50</sub> (μM) <sup>a</sup> |              |              |
|-------------------|------------------------------------|--------------|--------------|
|                   | HepG2                              | QSG-7701     | HeLa         |
| L-Arg-NI@CdSe     | 1.82 ± 0.22                        | 9.32 ± 0.13  | 1.98 ± 0.19  |
| L-Arg-NI@CdSe/CdS | 2.86 ± 0.26                        | 20.35 ± 0.16 | 2.98 ± 0.14  |
| L-Arg-NI@CdSe/ZnS | 3.22 ± 0.28                        | 35.26 ± 0.17 | 3.95 ± 0.17  |
| L-Lys-NI@CdSe     | 1.61 ± 0.24                        | 7.52 ± 0.14  | 1.86 ± 0.16  |
| L-Lys-NI@CdSe/CdS | 1.58 ± 0.23                        | 7.97 ± 0.16  | 1.92 ± 0.27  |
| L-Lys-NI@CdSe/ZnS | 2.67 ± 0.17                        | 10.56 ± 0.23 | 2.86 ± 0.24  |
| Amonafide         | 28.69 ± 0.27                       | 38.57 ± 0.17 | 33.65 ± 0.26 |
| L-Arg-NI          | 28.61 ± 0.46                       | 48.45 ± 0.47 | 29.27 ± 0.56 |
| L-Lys-NI          | 26.52 ± 0.52                       | 42.26 ± 0.44 | 24.36 ± 0.51 |
| CdSe              | 0.25 ± 0.12                        | 0.28 ± 0.08  | 0.23 ± 0.11  |
| CdSe/CdS          | 0.28 ± 0.09                        | 0.31 ± 0.08  | 0.26 ± 0.08  |
| CdSe/ZnS          | 0.38 ± 0.13                        | 0.46 ± 0.07  | 0.35 ± 0.12  |

<sup>a</sup> IC<sub>50</sub> values are given in μM, and the data are presented as mean values ± standard deviations, and cell viability is assessed after 48 h of incubation.
